# Supplementary material for: A Search for Parent-of-Origin Effects on Honey Bee Gene Expression
Source: PubMed Central journal article supplement (PMC4528322; doi:10.1534/g3.115.017814), 2015-06-05
Supplement: supp_g3.115.017814_TableS5.pdf [file supp_g3.115.017814_TableS5.pdf]

**Table S5. Depth of sequencing coverage for all samples, related to Experimental Procedures.**

The number of mapped reads and properly paired reads for each sample replicate. Mean coverage is calculated as (# mapped reads\*read length(bp)) / (total sequence length(bp)).

| <b>Sample</b>           | <b>Total reads</b> | <b>Mapped</b> | <b>Paired</b> | <b>Coverage*</b> |
|-------------------------|--------------------|---------------|---------------|------------------|
| <i>6R_drone</i>         | 117142832          | 74702857      | 64391032      | <b>29.38</b>     |
| <i>8B_drone</i>         | 124991604          | 85535921      | 73635406      | <b>33.64</b>     |
| <i>6R_queen</i>         | 114949298          | 97323965      | 92094406      | <b>41.79</b>     |
| <i>8B_queen</i>         | 391327620          | 347122687     | 332117964     | <b>149.05</b>    |
| <i>Instars_A_Blanco</i> | 30229044           | 30229044      | 26885324      | <b>167.53</b>    |
| <i>Instars_B_Blanco</i> | 35767847           | 35767847      | 31858708      | <b>198.22</b>    |
| <i>Instars_A_Rojo</i>   | 33813595           | 33813595      | 29820526      | <b>187.39</b>    |
| <i>Instars_B_Rojo</i>   | 32879078           | 32879078      | 29219912      | <b>182.21</b>    |
| <i>Guards_1_Blanco</i>  | 37275881           | 37275881      | 32898690      | <b>206.58</b>    |
| <i>Guards_2_Blanco</i>  | 44503015           | 44503015      | 38681402      | <b>246.63</b>    |
| <i>Guards_1_Rojo</i>    | 12310104           | 12310104      | 10789138      | <b>68.22</b>     |
| <i>Guards_2_Rojo</i>    | 10702645           | 10702645      | 9365404       | <b>59.31</b>     |
| <i>Brains_1_Blanco</i>  | 68461783           | 68461783      | 57180064      | <b>379.41</b>    |
| <i>Brains_2_Blanco</i>  | 14489590           | 14489590      | 12041090      | <b>80.30</b>     |
| <i>Brains_3_Blanco</i>  | 67738004           | 67738004      | 56525008      | <b>375.39</b>    |
| <i>Brains_1_Rojo</i>    | 25085265           | 25085265      | 20679418      | <b>139.02</b>    |
| <i>Brains_2_Rojo</i>    | 55130044           | 55130044      | 46079118      | <b>305.52</b>    |
| <i>Brains_3_Rojo</i>    | 34382456           | 34382456      | 28614778      | <b>190.54</b>    |

\*Calculated as  $(\#reads*length)/genome\_length$
